# Supplementary material for: Structural and functional studies on ternary coordination polymers from 5-bromoisophthalate and imidazole based flexible linker
Source: Royal Society of Chemistry journal article supplement (doi:10.1039/c3ra45411h), 2013-11-22
Supplement: c3ra45411h.pdf [file c3ra45411h.pdf]

Supporting Information

## Structural and Functional Studies on Ternary Coordination Polymers from 5-Bromoisophthalate and Imidazole based Flexible Linker

*Kamal Kumar Bisht,<sup>†,‡</sup> Yadagiri Rachuri,<sup>†,‡</sup> Bhavesh Parmar<sup>†</sup> and Eringathodi Suresh,<sup>\*,†,‡</sup>*

<sup>†</sup>Analytical Discipline and Centralized Instrument Facility, CSIR–Central Salt and Marine Chemicals Research Institute, Council of Scientific and Industrial Research, G. B. Marg, Bhavnagar –364 002, Gujarat, India

<sup>‡</sup>Academy of Scientific and Innovative Research (AcSIR), CSIR–Central Salt and Marine Chemicals Research Institute, Council of Scientific and Industrial Research, G. B. Marg, Bhavnagar –364 002, Gujarat, India

E-mail: [esuresh@csmcri.org](mailto:esuresh@csmcri.org) and [sureshe123@rediffmail.com](mailto:sureshe123@rediffmail.com)

---

**This supporting information file contains following data:**

1. **Fig. S1** FTIR spectra of **CP1-CP3**
2. **Fig. S2** TGA plots for **CP1-CP3**
3. **Fig. S3** Experimental and simulated PXRD patterns for pristine **CP1-CP3**
4. **Fig. S4** Time dependent absorbance recorded for **blank** and **CP1** catalyzed experiments for metanil yellow (MY) photodegradation using dilute H<sub>2</sub>O<sub>2</sub>
5. **Fig. S5** Experimental and simulated PXRD patterns for **CP1-CP3** recovered after photocatalysis experiments
6. **Fig. S6** Emission spectra of **CP2** and **CP3**
7. **Table S1** Selected bond length and bond angle for **CP1-CP3**

Supporting Information

**S1. FTIR of CP1-CP3 recorded for compounds dispersed in KBr pellets.**

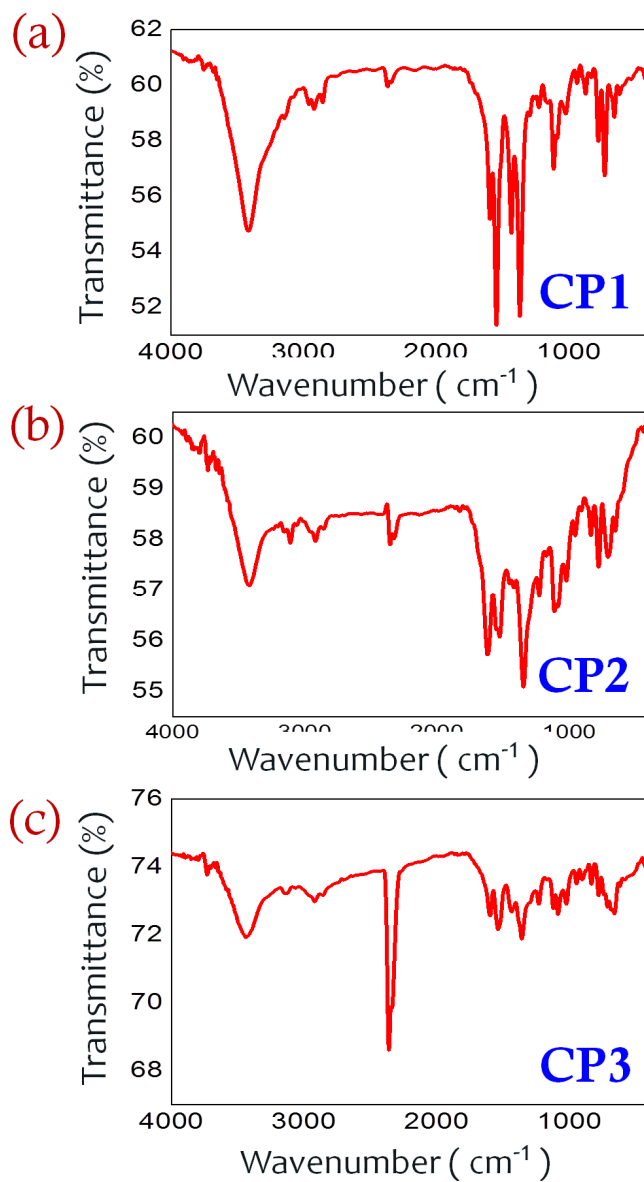

Supporting Information

**S2. TGA plots for compounds CP1-CP3.**

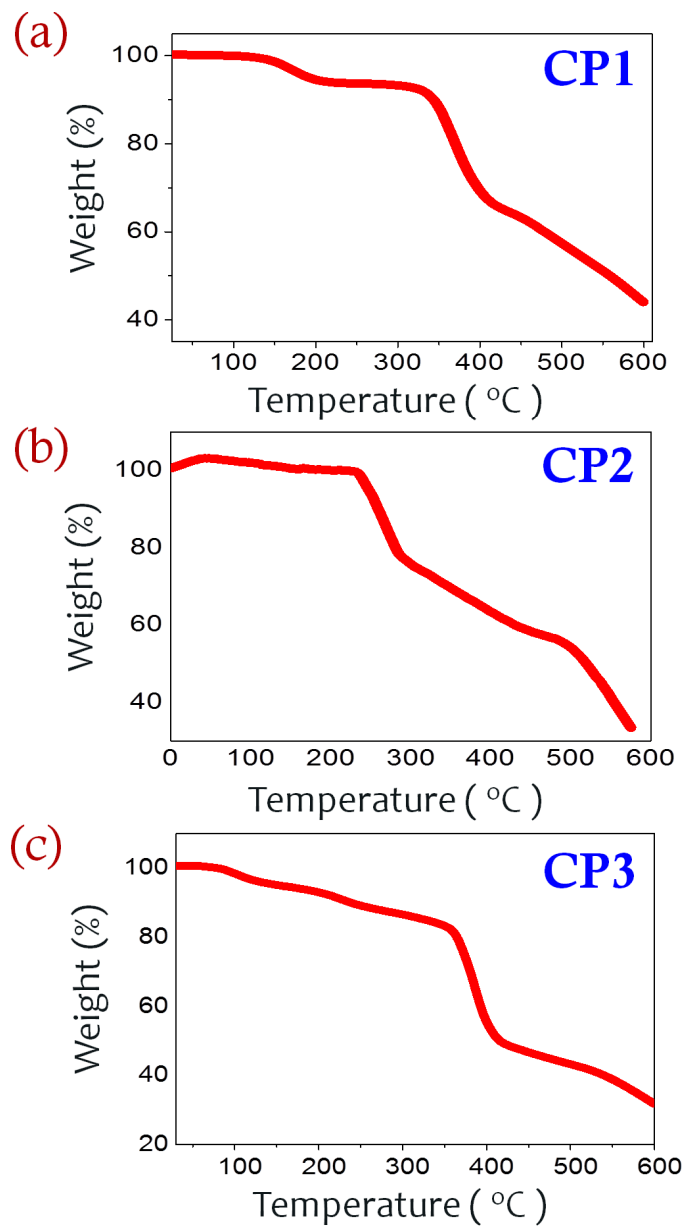

Supporting Information

**S3. Simulated and experimental PXRD of CP1-CP3.**

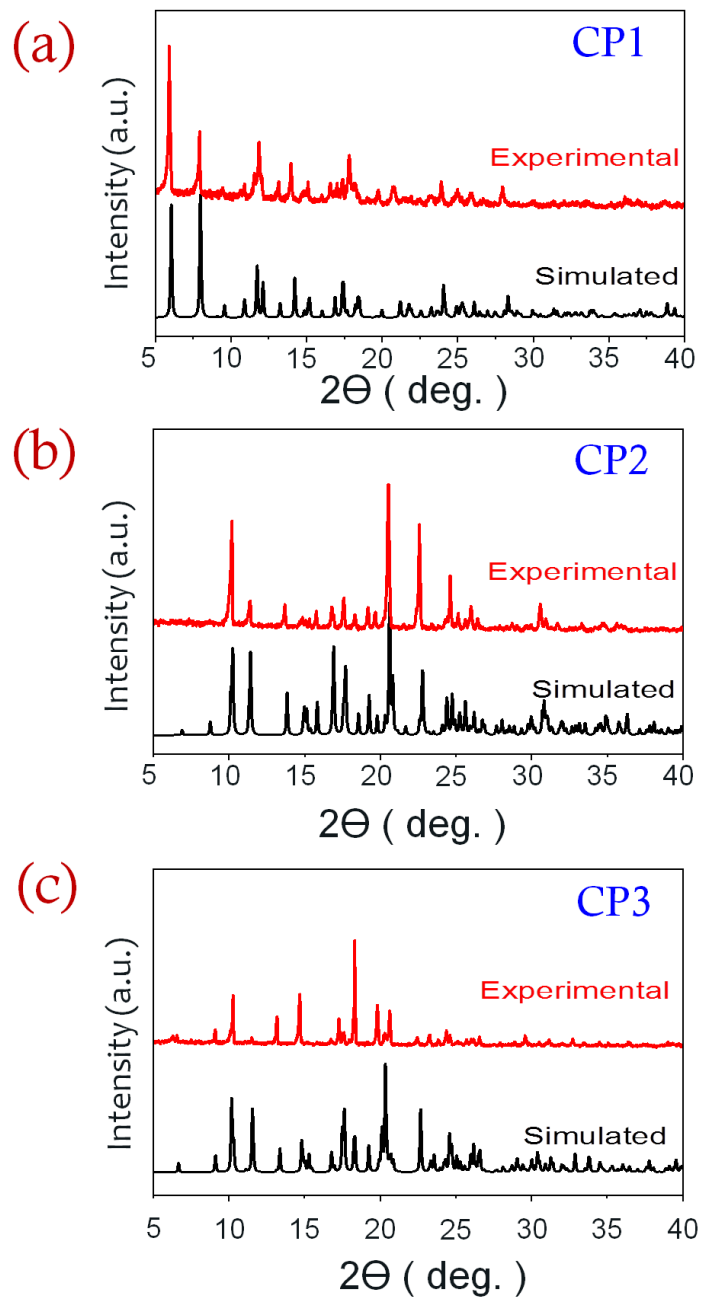

Supporting Information

**S4. Time dependent absorbance change recorded for the photocatalysis experiments using CP1 (top) and control experiment (bottom) for the metanil yellow (MY) photodegradation using dilute H<sub>2</sub>O<sub>2</sub>. Apparently, CP1 does not show much effect on the reaction.**

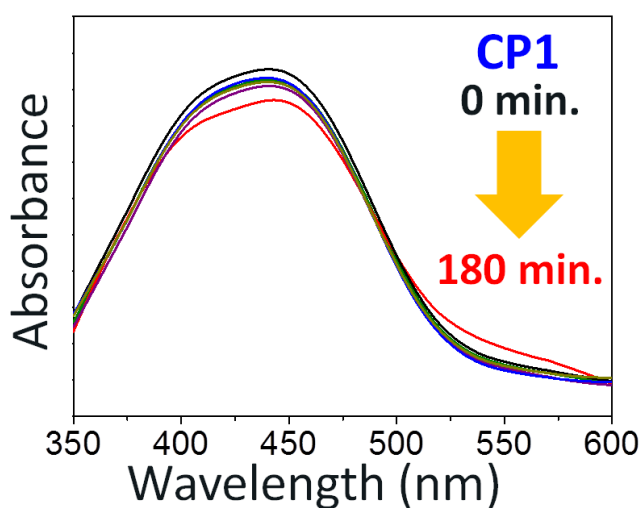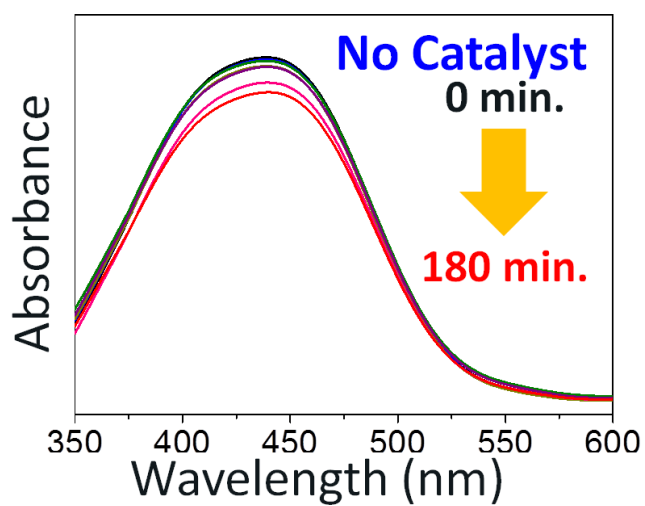

Supporting Information

**S5. PXRD profiles (Exp.) for the CPs recovered after photocatalysis reactions. Patterns simulated using single crystal data (Sim.) are also presented for Comparison.**

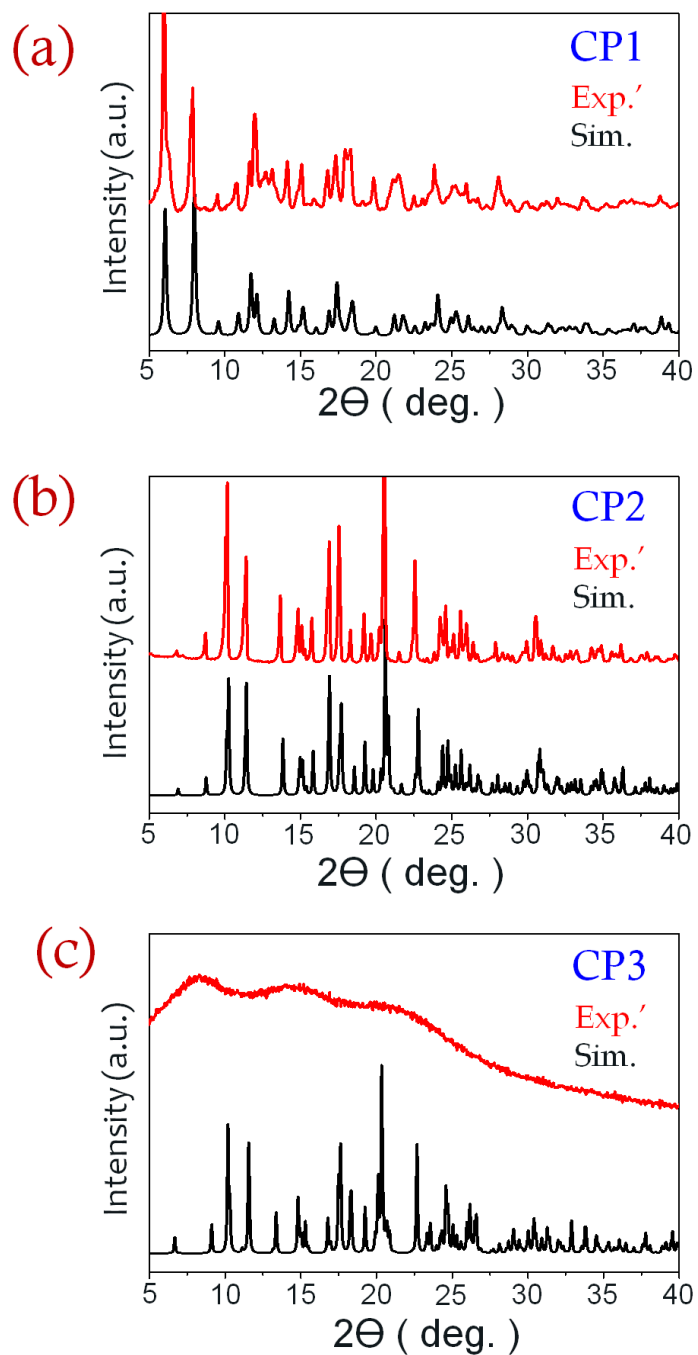

Supporting Information

**S6. Emission spectra of CP2 and CP3 (Inset comprises of digital photographs captured in day light and UV irradiation for CP2 and CP3).**

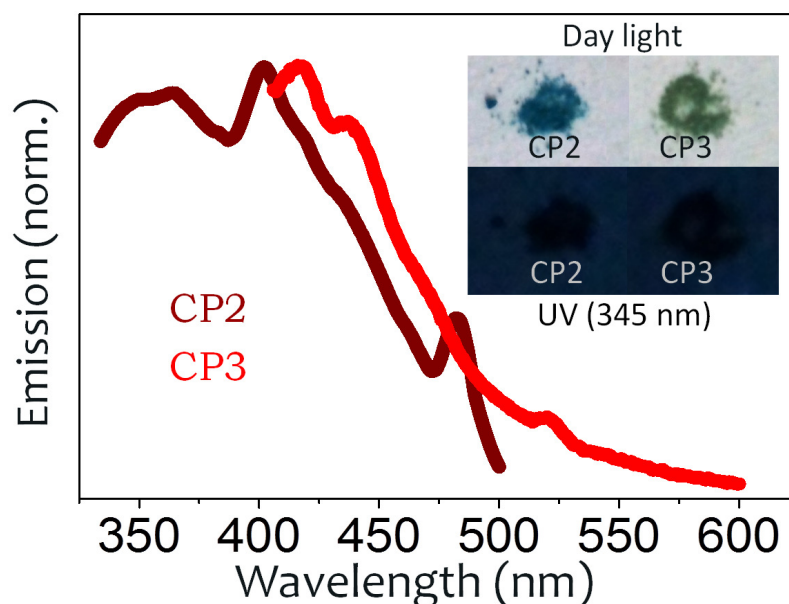

Moderate intensity emission bands at 364 nm ( $\lambda_{\text{ex}}$  290 nm) for **CP2** and at 416 nm ( $\lambda_{\text{ex}}$  379 nm) for **CP3** were observed. In solid state, geometrical proximity and rigidity of organic linkers can create favourable conformations for intra-ligand charge transfer processes resulting in good emission behaviour of CPs comprising open shell configuration metal nodes such as Cu(II) and Ni(II). Chen and other groups have underlined the complexity of MOF fluorescence in the recent articles and have established that the specific MOF/CP topologies and the rigid structural motifs may result in significant emissive behaviour regardless to the employed metal nodes.<sup>1</sup>

1. (a) Y. Cui, Y. Yue, G. Qian and B. Chen, *Chem. Rev.*, 2012, **112**, 1126; (b) J. J. Perry IV, P. L. Feng, S. T. Meek, K. Leong, F. P. Doty and M. D. Allendorf, *J. Mater. Chem.*, 2012, **22**, 10235; (c) C. C. Wang, W. Z. Lin, W. T. Huang, M. J. Ko, G. H. Lee, M. L. Ho, C. W. Lin, C. W. Shih and P. T. Chou, *Chem. Commun.*, 2008, 1299; (d) N. Zhao, K. Wang, W. Li, Y. Bian, C. Sun, Z. Chang and H. Fan, *Solid State Sci.*, 2011, **13**, 1948; (e) M. Barwiolek, E. Szlyk, T. M. Muzioła and T. Lis, *Dalton Trans.*, 2011, **40**, 11012.

Supporting Information

**Table S1. Selected bond length and bond angle for CP1-CP3**

| CP1                 |          |                     |          |
|---------------------|----------|---------------------|----------|
| Cd(1)-N(1)          | 2.247(9) | Cd(2)-O(4)#2        | 2.371(7) |
| Cd(1)-O(9)          | 2.304(8) | Cd(2)-O(3)#2        | 2.376(7) |
| Cd(1)-O(1)          | 2.328(7) | Cd(2)-O(6)          | 2.399(7) |
| Cd(1)-O(5)          | 2.369(7) | Cd(2)-O(5)          | 2.470(7) |
| Cd(1)-O(8)#1        | 2.450(7) | N(4)-Cd(2)#3        | 2.272(9) |
| Cd(1)-O(7)#1        | 2.452(7) | O(3)-Cd(2)#4        | 2.376(7) |
| Cd(1)-O(2)          | 2.486(6) | O(4)-Cd(2)#4        | 2.371(7) |
| Cd(2)-N(4)#1        | 2.272(9) | O(7)-Cd(2)#3        | 2.331(6) |
| Cd(2)-O(10)         | 2.299(7) | O(7)-Cd(1)#3        | 2.452(7) |
| Cd(2)-O(7)#1        | 2.331(7) | O(8)-Cd(1)#3        | 2.450(7) |
| N(1)-Cd(1)-O(9)     | 89.5(3)  | O(3)#2-Cd(2)-O(6)   | 158.1(3) |
| N(1)-Cd(1)-O(1)     | 96.3(3)  | N(4)#1-Cd(2)-O(5)   | 90.0(3)  |
| O(9)-Cd(1)-O(1)     | 84.7(3)  | O(10)-Cd(2)-O(5)    | 137.3(2) |
| N(1)-Cd(1)-O(5)     | 168.8(3) | O(7)#1-Cd(2)-O(5)   | 74.8(2)  |
| O(9)-Cd(1)-O(5)     | 88.1(2)  | O(4)#2-Cd(2)-O(5)   | 90.0(2)  |
| O(1)-Cd(1)-O(5)     | 94.4(3)  | O(3)#2-Cd(2)-O(5)   | 142.4(2) |
| N(1)-Cd(1)-O(8)#1   | 82.0(3)  | O(6)-Cd(2)-O(5)     | 53.6(2)  |
| O(9)-Cd(1)-O(8)#1   | 136.6(2) | N(4)#1-Cd(2)-C(8)#2 | 99.0(3)  |
| O(1)-Cd(1)-O(8)#1   | 138.4(2) | O(10)-Cd(2)-C(8)#2  | 105.8(3) |
| O(5)-Cd(1)-O(8)#1   | 92.3(2)  | O(7)#1-Cd(2)-C(8)#2 | 82.4(3)  |
| N(1)-Cd(1)-O(7)#1   | 94.4(3)  | O(4)#2-Cd(2)-C(8)#2 | 27.6(3)  |
| O(9)-Cd(1)-O(7)#1   | 85.2(2)  | O(3)#2-Cd(2)-C(8)#2 | 27.5(3)  |
| O(1)-Cd(1)-O(7)#1   | 165.2(3) | O(6)-Cd(2)-C(8)#2   | 167.9(3) |
| O(5)-Cd(1)-O(7)#1   | 74.5(2)  | O(5)-Cd(2)-C(8)#2   | 116.6(3) |
| O(8)#1-Cd(1)-O(7)#1 | 53.6(2)  | C(30)-N(4)-Cd(2)#3  | 126.3(7) |
| N(1)-Cd(1)-O(2)     | 97.4(3)  | C(29)-N(4)-Cd(2)#3  | 127.4(8) |
| O(9)-Cd(1)-O(2)     | 138.3(3) | C(1)-O(1)-Cd(1)     | 95.3(6)  |
| O(1)-Cd(1)-O(2)     | 53.8(2)  | C(1)-O(2)-Cd(1)     | 88.3(6)  |
| O(5)-Cd(1)-O(2)     | 91.6(2)  | C(8)-O(3)-Cd(2)#4   | 91.6(6)  |
| O(8)#1-Cd(1)-O(2)   | 85.0(2)  | C(8)-O(4)-Cd(2)#4   | 91.7(6)  |
| O(7)#1-Cd(1)-O(2)   | 134.6(2) | C(9)-O(5)-Cd(1)     | 115.0(6) |
| N(1)-Cd(1)-C(1)     | 98.4(3)  | C(9)-O(5)-Cd(2)     | 89.8(6)  |
| O(9)-Cd(1)-C(1)     | 111.5(3) | Cd(1)-O(5)-Cd(2)    | 102.8(3) |
| O(1)-Cd(1)-C(1)     | 27.0(3)  | C(9)-O(6)-Cd(2)     | 93.6(6)  |
| O(5)-Cd(1)-C(1)     | 92.6(3)  | C(16)-O(7)-Cd(2)#3  | 120.1(6) |



Supporting Information

|                     |          |                      |           |
|---------------------|----------|----------------------|-----------|
| O(8)#1-Cd(1)-C(1)   | 111.8(3) | C(16)-O(7)-Cd(1)#3   | 92.4(6)   |
| O(7)#1-Cd(1)-C(1)   | 158.9(3) | Cd(2)#3-O(7)-Cd(1)#3 | 104.6(3)  |
| O(2)-Cd(1)-C(1)     | 26.8(3)  | C(16)-O(8)-Cd(1)#3   | 92.4(6)   |
| N(4)#1-Cd(2)-O(10)  | 88.3(3)  | Cd(1)-O(9)-H(9C)     | 107(8)    |
| N(4)#1-Cd(2)-O(7)#1 | 163.4(3) | Cd(1)-O(9)-H(9D)     | 97(8)     |
| O(10)-Cd(2)-O(7)#1  | 107.4(3) | Cd(2)-O(10)-H(10C)   | 103(6)    |
| N(4)#1-Cd(2)-O(4)#2 | 92.4(3)  | Cd(2)-O(10)-H(10D)   | 146(7)    |
| O(10)-Cd(2)-O(4)#2  | 132.7(2) | O(2)-C(1)-O(1)       | 122.5(10) |
| O(7)#1-Cd(2)-O(4)#2 | 81.2(2)  | O(2)-C(1)-Cd(1)      | 64.9(5)   |
| N(4)#1-Cd(2)-O(3)#2 | 103.7(3) | O(1)-C(1)-Cd(1)      | 57.7(5)   |
| O(10)-Cd(2)-O(3)#2  | 78.8(2)  | C(2)-C(1)-Cd(1)      | 174.6(7)  |
| O(7)#1-Cd(2)-O(3)#2 | 85.2(2)  | O(3)-C(8)-O(4)       | 121.5(9)  |
| O(4)#2-Cd(2)-O(3)#2 | 55.1(2)  | O(3)-C(8)-Cd(2)#4    | 60.9(5)   |
| N(4)#1-Cd(2)-O(6)   | 88.6(3)  | O(4)-C(8)-Cd(2)#4    | 60.6(5)   |
| O(10)-Cd(2)-O(6)    | 83.7(2)  | C(6)-C(8)-Cd(2)#4    | 179.1(7)  |
| O(7)#1-Cd(2)-O(6)   | 87.6(2)  | O(6)-C(9)-O(5)       | 122.7(9)  |
| O(4)#2-Cd(2)-O(6)   | 143.6(2) |                      |           |

Symmetry transformation: #1 -x,y+1/2,-z+1/2 ; #2 x,y+1,z ; #3 -x,y-1/2,-z+1/2; #4 x,y-1,z

**CP2**

|                     |            |                    |          |
|---------------------|------------|--------------------|----------|
| Cu(1)-N(1)          | 1.957(3)   | Cu(1)-O(5)         | 2.221(3) |
| Cu(1)-N(4)#1        | 1.968(3)   | N(4)-Cu(1)#3       | 1.968(3) |
| Cu(1)-O(1)          | 1.988(3)   | O(3)-Cu(1)#4       | 2.053(3) |
| Cu(1)-O(3)#2        | 2.053(3)   |                    |          |
| N(1)-Cu(1)-N(4)#1   | 178.22(13) | C(11)-N(1)-Cu(1)   | 127.9(3) |
| N(1)-Cu(1)-O(1)     | 91.03(12)  | C(9)-N(1)-Cu(1)    | 126.0(3) |
| N(4)#1-Cu(1)-O(1)   | 88.51(12)  | C(22)-N(4)-Cu(1)#3 | 127.6(3) |
| N(1)-Cu(1)-O(3)#2   | 90.38(12)  | C(21)-N(4)-Cu(1)#3 | 126.7(3) |
| N(4)#1-Cu(1)-O(3)#2 | 91.09(12)  | C(1)-O(1)-Cu(1)    | 121.1(3) |
| O(1)-Cu(1)-O(3)#2   | 139.15(11) | C(8)-O(3)-Cu(1)#4  | 127.8(3) |
| N(1)-Cu(1)-O(5)     | 85.82(13)  | Cu(1)-O(5)-H(5C)   | 89(3)    |
| N(4)#1-Cu(1)-O(5)   | 93.08(13)  | Cu(1)-O(5)-H(5D)   | 127(4)   |
| O(1)-Cu(1)-O(5)     | 127.10(11) | O(2)-C(1)-O(1)     | 126.4(4) |
| O(3)#2-Cu(1)-O(5)   | 93.72(11)  | O(4)-C(8)-O(3)     | 127.0(4) |

Symmetry transformation: #1 x-1,y+1,z; #2 x,y-1,z; #3 x+1,y-1,z;  
 #4 x,y+1,z

Supporting Information

| CP3                                                                            |            |                    |            |
|--------------------------------------------------------------------------------|------------|--------------------|------------|
| Ni(1)-N(4)#1                                                                   | 2.024(5)   | Ni(1)-O(2)         | 2.119(4)   |
| Ni(1)-N(1)                                                                     | 2.033(5)   | Ni(1)-O(1)         | 2.235(4)   |
| Ni(1)-O(5)                                                                     | 2.063(4)   | O(4)-Ni(1)#3       | 2.070(4)   |
| Ni(1)-O(4)#2                                                                   | 2.070(4)   | N(4)-Ni(1)#4       | 2.024(5)   |
| N(4)#1-Ni(1)-N(1)                                                              | 176.9(2)   | O(4)#2-Ni(1)-O(1)  | 167.45(16) |
| N(4)#1-Ni(1)-O(5)                                                              | 88.41(19)  | O(2)-Ni(1)-O(1)    | 60.69(15)  |
| N(1)-Ni(1)-O(5)                                                                | 94.5(2)    | C(1)-O(1)-Ni(1)    | 85.8(3)    |
| N(4)#1-Ni(1)-O(4)#2                                                            | 89.94(18)  | C(1)-O(2)-Ni(1)    | 91.7(4)    |
| N(1)-Ni(1)-O(4)#2                                                              | 90.75(18)  | C(8)-O(4)-Ni(1)#3  | 127.2(4)   |
| O(5)-Ni(1)-O(4)#2                                                              | 92.72(17)  | Ni(1)-O(5)-H(5C)   | 94(5)      |
| N(4)#1-Ni(1)-O(2)                                                              | 88.78(18)  | Ni(1)-O(5)-H(5D)   | 136(6)     |
| N(1)-Ni(1)-O(2)                                                                | 88.16(18)  | C(11)-N(1)-Ni(1)   | 128.7(4)   |
| O(5)-Ni(1)-O(2)                                                                | 160.22(16) | C(9)-N(1)-Ni(1)    | 127.5(4)   |
| O(4)#2-Ni(1)-O(2)                                                              | 106.85(16) | C(22)-N(4)-Ni(1)#4 | 126.7(4)   |
| N(4)#1-Ni(1)-O(1)                                                              | 88.35(18)  | C(21)-N(4)-Ni(1)#4 | 128.4(4)   |
| N(1)-Ni(1)-O(1)                                                                | 90.33(17)  | O(2)-C(1)-O(1)     | 121.6(5)   |
| O(5)-Ni(1)-O(1)                                                                | 99.66(16)  | O(3)-C(8)-O(4)     | 126.4(6)   |
| Symmetry transformation: #1 x-1,y+1,z; #2 x,y+1,z; #3 x,y-1,z;<br>#4 x+1,y-1,z |            |                    |            |
